# Supplementary material
Source: Springer Nature journal article supplement (https://www.springermedizin.de/resource/supplementary/12967_2007_211_MOESM1_ESM.pdf/9575956)

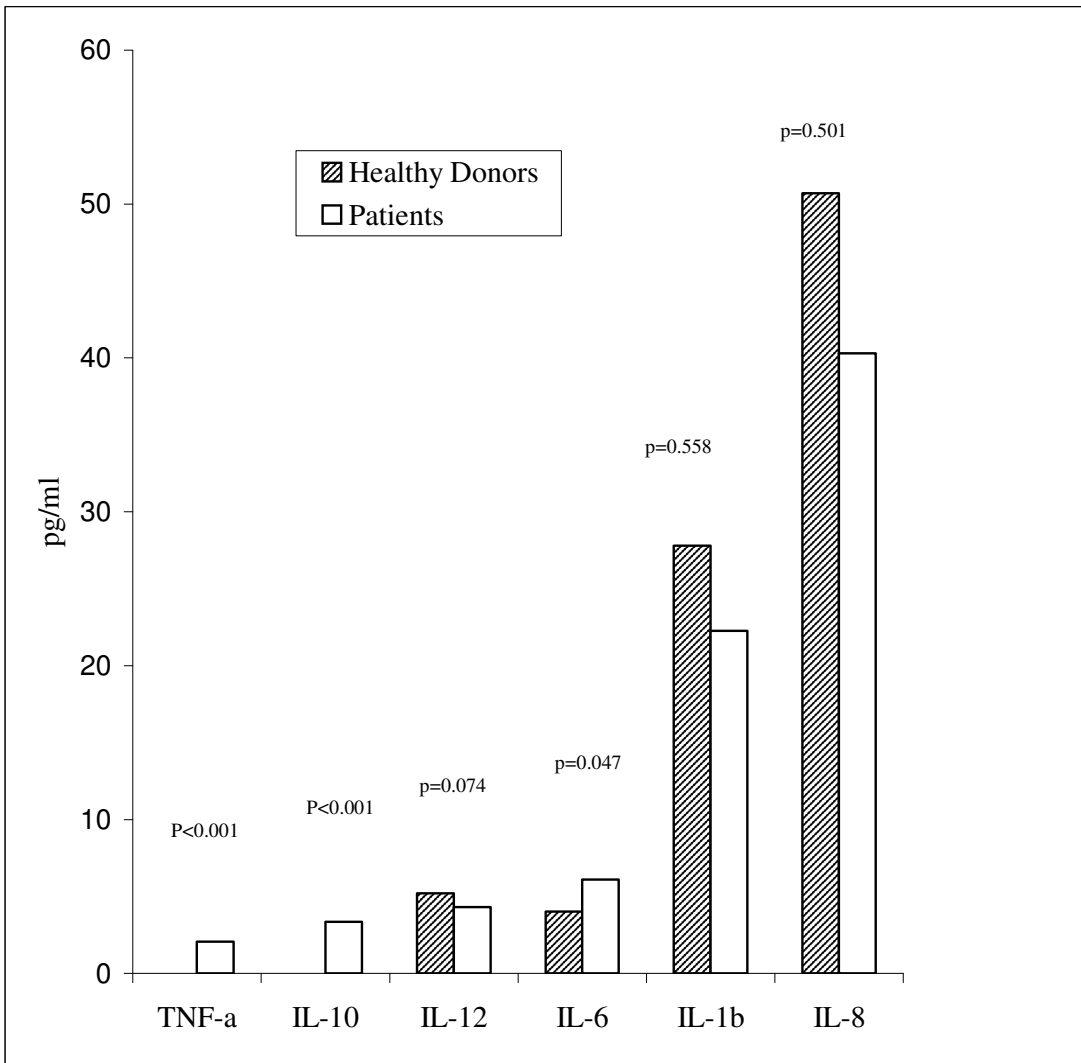

Supplement: MOESM1 [file 9575956]
